# Supplementary material for: Health status of the red-billed tropicbird ( Phaethon aethereus ) determined by hematology, biochemistry, blood gases, and physical examination
Source: PeerJ journal article supplement (doi:10.7717/peerj.15713), 2023-08-07
Supplement: Galapagos_Science_Center_GSC_letter.pdf [file Galapagos_Science_Center_GSC_letter.pdf]

**From:** Carlos F. Mena, PhD, Director USFQ Galapagos Campus; Co-Director, Galapagos Science Center, Professor, School of Biological and Environmental Sciences.

**To:** Carlos Valle, PhD; Dean and Professor, School of Biological and Environmental Sciences.

**Re:** Manuscript “Health status of the red-billed tropic bird (*Phaethon aethereus*) determined by hematology, biochemistry, blood gases, and physical examination” submitted to PeerJ

**Date:** September 30<sup>th</sup>, 2022

Dear Dr. Valle,

This letter is to confirm that the study “Health status of the red-billed tropic bird (*Phaethon aethereus*) determined by hematology, biochemistry, blood gases, and physical examination” was developed under an Ecuadorian Government Research Permits, given by the Galapagos National Park, numbers PC-57-16 and PC-59-17, to C.A. Valle. The official permit regulates access, manipulation, and wellbeing of wildlife. In this specific case, of red-billed tropic bird (*Phaethon aethereus*) species. All protocols related to the manipulation of wildlife were in absolute compliance with established protocols.

I am ready to respond any further questions,

Sincerely,

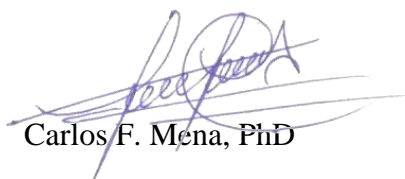

Carlos F. Mena, PhD

Professor, School of Biological and Environmental Sciences.  
Co-Director, Galapagos Science Center  
Director, USFQ Institute of Geography  
Director, USFQ Campus Galapagos  
Universidad San Francisco de Quito USFQ

Avenida Alsacio Northia  
Frente a Playa Mann  
Puerto Baquerizo Moreno  
Ecuador

(+593) 5 252 0092

[info@galapagossience.org](mailto:info@galapagossience.org)

[www.galapagossience.org](http://www.galapagossience.org)
