# Supplementary material for: Health status of the red-billed tropicbird (Phaethon aethereus) determined by hematology, biochemistry, blood gases, and physical examination
Source: PeerJ. 2023 Aug 7;11:e15713. doi: 10.7717/peerj.15713 (PMC10414024; doi:10.7717/peerj.15713)
Supplement: Supplemental Information 1 — All morphometric and blood values for the red-billed tropic birds in this study. [file peerj-11-15713-s001.xlsx]

## Sheet: Sheet1
istat_number	Year	Bill_length	bill_depth	bill_width	wing_length	tarsus	weight	temperature	heart_rate	respiratory_weight	sample_time	Handling_time	Heterophils	Monocytes	Eosinophils	Lymphocytes	Basophils	WBC_Estimates	Lactate_mmol/L_mg/dL	Na	K	Cl-	iCa	TCO2	Glucose	BUN	CREA	PCV_%	Hematocrite_%PCV	Hemoglobine	pH	PCO2	PO2	Beecf	HCO3
37	2016	40.7	20	8.94	29.8	2.41	0.665	40	300	30	00:04:00	00:12:00	56	4.5	11	28.5	0	4400	1.4	141	3.7	N/A	1.24	26	362	N/A	N/A	53.5	42	14.3	7.505	32.2	40	2	25.4
47	2016	49.93	20.17	9.05	30.5	2.723	0.65	41	170	40	00:10:00	N/A	32	0.5	51.5	16	0	3700	1.7	143	3.9	N/A	1.13	23	341	N/A	N/A	50	40	13.6	7.521	27.6	64	0	22.6
48	2016	49.34	20.23	9.55	31.5	2.738	0.56	39	200	20	00:08:00	00:12:00	23	1.5	62.5	13	0	3000	2.6	144	4	N/A	1.11	18	314	N/A	N/A	45	38	12.9	7.381	28.9	57	-8	17.1
49	2016	45.59	11.23	8.12	31.8	2.898	0.56	38.7	360	30	00:18:00	00:19:00	39.5	1.5	27	32	0	3300	4.8	138	3.3	N/A	1.07	17	429	N/A	N/A	37.5	34	11.6	7.367	27.8	72	-9	15.9
53	2016	54.84	20.52	8.74	30.09	2.72	0.63	40.2	210	40	00:07:00	00:05:00	33	2.5	28	36.5	0	3100	2	145	3.6	N/A	1.27	19	362	N/A	N/A	N/A	40	13.6	7.436	27.7	55	-6	18.6
54	2016	49.67	18.72	8.43	30	2.645	0.63	41.2	300	40	00:12:00	00:14:00	48.5	1.5	16	34	0	3100	2.1	141	3.7	N/A	1.12	14	337	N/A	N/A	53	42	14.3	7.402	22	75	-11	13.7
57	2016	46.62	19.23	9.39	31	3.134	0.52	38.5	200	30	00:38:00	00:40:00	39.5	2.5	18	40	0	3700	3.5	139	3.5	N/A	1.24	19	318	N/A	N/A	N/A	37	12.6	7.381	29.9	66	-7	17.7
58	2016	51.91	19.73	9.48	31	3.062	0.66	37.7	250	30	00:22:00	00:32:00	55	0.5	11.5	33	0	3200	5.2	143	3.9	N/A	1.3	17	335	N/A	N/A	46.5	40	13.6	7.355	28.2	63	-10	15.8
59	2016	48.1	18.92	7.4	30	4.958	0.58	38.2	250	30	00:13:00	00:17:00	39	0	35	26	0	3000	4.2	131	5.4	N/A	0.48	17	231	N/A	N/A	N/A	30	10.2	7.692	13.3	42	-4	16.2
72	2016	47.76	20.8	8.68	39	2.736	0.635	40.8	150	30	00:08:00	00:09:00	41.5	4.5	24.5	29.5	0	2900	3.5	144	3.6	N/A	1.24	24	324	N/A	N/A	N/A	43	14.6	7.506	29.7	57	0	23.5
79	2016	4.408	18.5	8.013	29.99	2.555	0.595	38.2	200	40	00:04:00	00:10:00	34	2	13.5	50.5	0	3400	6.6	145	3.4	N/A	1.29	18	319	N/A	N/A	N/A	40	13.6	7.313	33.1	58	-9	16.8
91	2016	51.1	19.91	7.76	28.8	3.122	0.64	40.3	500	50	00:05:00	00:11:00	28	0	41.5	30.5	0	2600	2.7	141	3.2	N/A	1.14	15	326	N/A	N/A	N/A	39	13.3	7.408	23.2	64	-10	14.6
98	2016	18.7	8.24	3	30	2.876	0.6	41.2	300	40	N/A	N/A	31	1	37	31	0	2800	5.8	142	3.3	N/A	0.94	14	333	N/A	N/A	47.5	37	12.6	7.417	21.1	60	-11	13.6
99	2016	50.03	18.73	8.2	29.9	2.686	0.32	39	350	40	00:11:00	00:16:00	38	2	19.5	40.5	0	3500	5.6	142	3.3	N/A	0.96	18	291	N/A	N/A	65	44	15	7.263	37.2	40	-10	16.8
117	2016	50.28	19.02	8.38	30.6	2.734	0.68	39.2	230	30	00:00:00	10:52:00	32.5	1	18.5	48	0	3200	4.3	143	2.7	N/A	1.01	19	306	N/A	N/A	N/A	39	13.3	7.314	35.6	51	-8	18.1
119	2016	48.88	17.94	7.91	38.7	3.399	0.61	39.5	200	50	N/A	00:15:00	33	1	2	64	0	4000	3.8	135	3.7	N/A	1.05	17	305	N/A	N/A	55	40	13.6	7.382	27.3	52	-9	16.3
133	2016	50.47	19.33	8.83	32.1	2.638	0.57	38.6	220	30	00:12:00	00:14:00	26	4	47.5	22.5	0	3100	3.3	141	3.4	N/A	0.97	14	290	N/A	N/A	N/A	37	12.6	7.358	24	63	-12	13.5
135	2016	51.38	19	9.61	32.5	2.832	0.3	39	240	35	00:02:00	00:09:00	24	3	16.5	56.5	0	2600	2.6	146	3.4	N/A	1.19	22	346	N/A	N/A	30	39	13.3	7.356	37.3	46	-5	20.9
138	2016	52.6	19.44	8.28	30.9	2.611	0.65	40	280	50	00:13:00	00:18:00	19	2	54	25	0	4000	1.2	138	3.3	N/A	0.7	12	246	N/A	N/A	N/A	32	10.9	7.446	17.2	87	-12	11.9
139	2016	49.47	19.47	8.49	30.1	2.689	0.61	39.6	240	30	N/A	00:10:00	21.5	1	48	29.5	0	3400	1.9	144	3.1	N/A	1.23	19	308	N/A	N/A	N/A	43	14.6	7.43	27.2	62	-6	18.1
140	2016	58.06	20.2	8.4	28.7	2.58	0.7	38.8	180	40	00:05:00	00:12:00	35.5	1.5	28.5	34.5	0	3900	4.1	143	3.7	N/A	0.93	18	258	N/A	N/A	N/A	39	13.3	7.345	31.6	46	-8	17.3
96	2017	63.9	23.99	11.25	31.07	3.56	0.6	38.5	248	28	00:03:00	00:14:00	39	0	28	33	0	34400	5.5	142	3.1	133	0.91	15	268	23	0.7	29	34	11.6	N/A	N/A	N/A	N/A	N/A
97	2017	69.97	22.22	11.49	32.02	3.095	0.62	38.2778	264	32	00:05:00	00:15:00	15.5	0.5	62.5	21.5	0	16600	3.5	139	3.3	127	0.94	18	263	6	0.8	21	42	14.3	N/A	N/A	N/A	N/A	N/A
98	2017	60.73	21.86	11.12	39.02	3.591	0.73	39.8889	304	52	00:03:00	00:13:00	22.5	0	53.5	24	0	15300	4.1	140	3.7	115	0.93	18	301	7	1.1	25	37	12.6	N/A	N/A	N/A	N/A	N/A
99	2017	62.03	22.01	11.62	29.09	2.883	0.62	39.6111	260	24	00:04:00	00:15:00	38	0	24.5	37.5	0	8500	5.8	139	3.4	121	0.92	14	289	5	0.7	29	34	11.6	N/A	N/A	N/A	N/A	N/A
100	2017	64.06	21.91	10.99	30.07	2.989	0.5	39.6667	212	24	00:03:00	00:12:00	40.5	0	34.5	25	0	19600	2.6	141	3.5	137	0.61	14	252	21	0.8	13	35	11.9	N/A	N/A	N/A	N/A	N/A
101	2017	60.7	21.32	12.15	31.02	2.195	0.6	39.5	300	32	00:04:00	00:12:00	41	0	29	30	0	27100	3.6	146	3.6	121	1.13	17	297	6	0.7	17	41	13.9	N/A	N/A	N/A	N/A	N/A
102	2017	69.96	21.52	12.04	30.05	3.566	0.61	39.7222	220	16	00:04:00	00:10:00	8.5	0	68	23.5	0	43100	4.7	134	3	N/A	0.48	18	244	15	1	24	21	7.1	N/A	N/A	N/A	N/A	N/A
103	2017	58.49	22.02	12.21	31.91	3.801	0.6	39.7222	180	16	00:11:00	00:20:00	54	0.5	7.5	38	0	18100	3.8	145	2.8	123	1.1	18	317	18	0.7	23	40	13.6	N/A	N/A	N/A	N/A	N/A
105	2017	58.53	19.94	12.64	31.4	3.775	0.6	41.6111	168	44	00:16:00	00:25:00	33.5	2	30	34.5	0	16000	2	146	3.4	122	1.05	18	311	28	1.1	14	36	12.2	N/A	N/A	N/A	N/A	N/A
106	2017	64.2	22.79	12.76	31.4	3.509	0.54	40	200	24	00:04:00	00:14:00	23	1	46	30	0	20500	3.6	142	2.8	114	0.75	23	290	15	1	25	29	9.9	N/A	N/A	N/A	N/A	N/A
107	2017	61.38	21.03	13.48	32.01	3.998	0.59	38.2778	224	16	00:09:00	00:17:00	26.5	3	37	33.5	0	19800	3.6	138	3.4	121	0.84	16	107	28	0.6	23	32	10.9	N/A	N/A	N/A	N/A	N/A
108	2017	63.99	19.56	11.84	30.09	3.493	0.6	39.3889	200	28	00:03:00	00:13:00	10.5	0	53.5	36	0	40800	5.3	139	3.4	134	0.81	15	247	11	7	21	35	11.9	N/A	N/A	N/A	N/A	N/A
109	2017	63.45	20.6	11.59	33.01	3.305	0.54	40.0556	200	24	00:07:00	00:15:00	64.5	1	6	28.5	0	10800	2.9	N/A	N/A	N/A	N/A	N/A	N/A	N/A	N/A	31	N/A	N/A	N/A	N/A	N/A	N/A	N/A
110	2017	65.67	22.52	11.4	32	3.387	0.6	40.6111	220	20	00:10:00	00:12:00	46.5	3	19.5	31	0	14500	2	142	5.1	122	0.99	14	321	5	0.5	30	43	14.6	N/A	N/A	N/A	N/A	N/A
111	2017	60.82	21.44	12.51	31.02	3.604	0.58	41.2778	152	100	00:05:00	00:09:00	56.5	2.5	11	30	0	8200	5.7	141	3.5	118	0.92	13	347	7	1	22	33	11.2	N/A	N/A	N/A	N/A	N/A
112	2017	61.3	19.86	10.67	30.06	3.092	0.62	39.2222	224	48	00:03:00	00:13:00	32	0	29.5	38.5	0	18400	3.7	143	3.7	123	1.02	13	301	5	0.8	23	35	11.9	N/A	N/A	N/A	N/A	N/A
113	2017	60.94	21.22	11.16	30.06	3.581	0.58	40.2778	180	40	00:13:00	00:28:00	13.5	3	55	29	0	41000	3.4	142	2.6	119	0.93	18	370	7	0.9	18	29	9.9	N/A	N/A	N/A	N/A	N/A
114	2017	64.03	23.21	12.07	33.07	3.005	0.6	40.6111	224	40	00:04:00	00:25:00	N/A	N/A	N/A	N/A	N/A	N/A	3.2	129	3.9		0.37	12	171	10	0.3	13	25	8.5	N/A	N/A	N/A	N/A	N/A
115	2017	62.81	21.14	10.55	31.06	3.533	0.56	40	216	36	00:06:00	00:22:00	27.5	1	21.5	49.5	0.5	31900	3.9	142	3.4	130	0.88	18	244	13	0.7	22	36	12.2	N/A	N/A	N/A	N/A	N/A
116	2017	61.84	21.81	10.89	31.56	3.778	0.62	39.3889	200	40	00:09:00	00:24:00	42	1.5	8.5	48	0	12100	2.3	116	6.6	N/A	0	14	172	4	0.3	19	18	6.1	N/A	N/A	N/A	N/A	N/A
117	2017	60.32	21.6	11.05	30.05	3.365	0.65	40.1111	200	60	00:02:00	00:10:00	43	3.5	16	37.5	0	14500	4.1	144	2.4	120	1.12	18	340	6	0.7	26	40	13.6	N/A	N/A	N/A	N/A	N/A
118	2017	62.55	25.62	12.5	31.04	3.673	0.58	40.7222	144	24	00:08:00	00:16:00	25.5	1.5	43.5	29.5	0	33100	4.6	134	3.1	113	0.65	21	377	6	0.9	21	35	11.9	N/A	N/A	N/A	N/A	N/A
119	2017	60.01	21.02	11.58	29.06	3.334	0.6	41.6111	220	36	00:06:00	00:15:00	51	2.5	8	39	0	22600	2.4	142	3.3	122	1.1	17	389	7	1.1	27	35	11.9	N/A	N/A	N/A	N/A	N/A
120	2017	62.16	21.29	11.58	31.01	3.391	0.61	39.5	264	36	00:04:00	00:08:00	25.5	2	40.5	32	0	30200	3	141	3	116	1.07	19	304	10	1.4	21	33	11.2	N/A	N/A	N/A	N/A	N/A
121	2017	67.2	22.44	12.73	29.03	3.363	0.65	38.1111	284	24	00:07:00	00:10:00	30.5	3	19	47.5	0	29500	4.8	135	2.7	122	0.65	16	235	<3	0.6	25	35	11.9	N/A	N/A	N/A	N/A	N/A
122	2017	60.3	20.8	10.75	32.06	3.138	0.63	38.9444	240	40	00:05:00	00:10:00	14.5	0.5	45.5	39.5	0	99100	5.1	139	3	114	1.04	21	323	8	1	16	34	11.6	N/A	N/A	N/A	N/A	N/A
123	2017	66.27	21.67	12.83	29.09	3.876	0.58	39.1111	232	28	00:04:00	00:10:00	40	2	13	45	0	30600	6	143	2.7	121	1.06	18	301	1	0.8	21	38	12.9	N/A	N/A	N/A	N/A	N/A
124	2017	67.77	22.61	11.88	32.07	3.601	0.54	38.5	284	24	00:06:00	00:13:00	37.5	4	22	36.5	0	23300	6.5	148	3.4	122	1.12	17	300	26	0.8	20	49	16.7	N/A	N/A	N/A	N/A	N/A
125	2017	62.17	21.13	12.09	31.07	3.382	0.58	41.0556	240	40	N/A	00:13:00	41	3.5	24.5	31	0	22100	5.7	141	4.1	113	0.88	20	281	10	2	15	34	11.6	N/A	N/A	N/A	N/A	N/A
126	2017	64.95	21.71	12.03	31.03	3.522	0.58	39.5556	272	32	00:07:00	00:11:00	33	3.5	31.5	32	0	23500	2.5	136	3	123	0.67	16	227	5	0.4	18	35	11.9	N/A	N/A	N/A	N/A	N/A
